# Supplementary material for: Self-templating synthesis of heteroatom-doped large-scalable carbon anodes for high-performance lithium-ion batteries
Source: Royal Society of Chemistry journal article supplement (doi:10.1039/d1qi01105g), 2021-11-17
Supplement: d1qi01105g1.pdf [file d1qi01105g1.pdf]

## Supplementary Information

### Self-Templating Synthesis of Heteroatom-Doped Large-Scalable

### Carbon Anodes for High-Performance Lithium-Ion Batteries

Ghulam Yasin <sup>a, b, c, \*</sup>, Muhammad Arif <sup>d</sup>, Jiameng Ma <sup>a</sup>, Shumaila Ibraheem <sup>c</sup>, Donglin Yu <sup>a</sup>, Lipeng Zhang <sup>a</sup>, Dong Liu <sup>a, \*</sup>, Liming Dai <sup>e, \*</sup>

<sup>a</sup> State Key Laboratory of Organic-Inorganic Composites, Center for Soft Matter Science and Engineering, Beijing University of Chemical Technology, Beijing 100029, China.

<sup>b</sup> College of Materials Science and Engineering, Beijing University of Chemical Technology, Beijing 100029, China.

<sup>c</sup> Institute for Advanced Study, Shenzhen University, Shenzhen 518060, Guangdong, China.

<sup>d</sup> State Key Laboratory of Chemical Resource Engineering, College of Chemical Engineering, Beijing University of Chemical Technology, Beijing 100029, China.

<sup>e</sup> School of Chemical Engineering, University of New South Wales, Sydney, NSW2052, Australia.

Corresponding Authors:

[yasin@mail.buct.edu.cn](mailto:yasin@mail.buct.edu.cn) (G. Yasin)

[liudong@mail.buct.edu.cn](mailto:liudong@mail.buct.edu.cn) (D. Liu)

[l.dai@unsw.edu.au](mailto:l.dai@unsw.edu.au) (L. Dai)

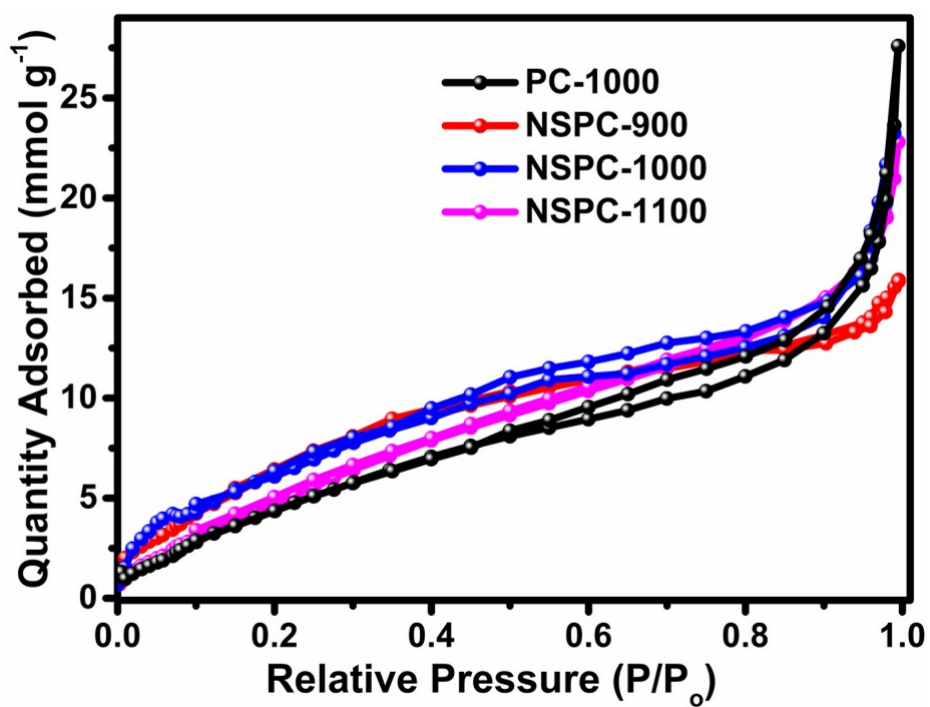

**Figure S1.** Nitrogen adsorption and desorption isotherms for PC-1000, NSPC-900, NSPC-1000 and NSPC-1100.

**Table S1:** Summary of the d-spacing of prepared samples.

| Samples                              | NSPC-900 | NSPC-1000 | NSPC-1100 | PC-1000 |
|--------------------------------------|----------|-----------|-----------|---------|
| <b>2<math>\Theta</math> (degree)</b> | 24.91    | 24.27     | 24.19     | 25.38   |
| <b>d<sub>002</sub> (nm)</b>          | 0.357    | 0.367     | 0.369     | 0.351   |

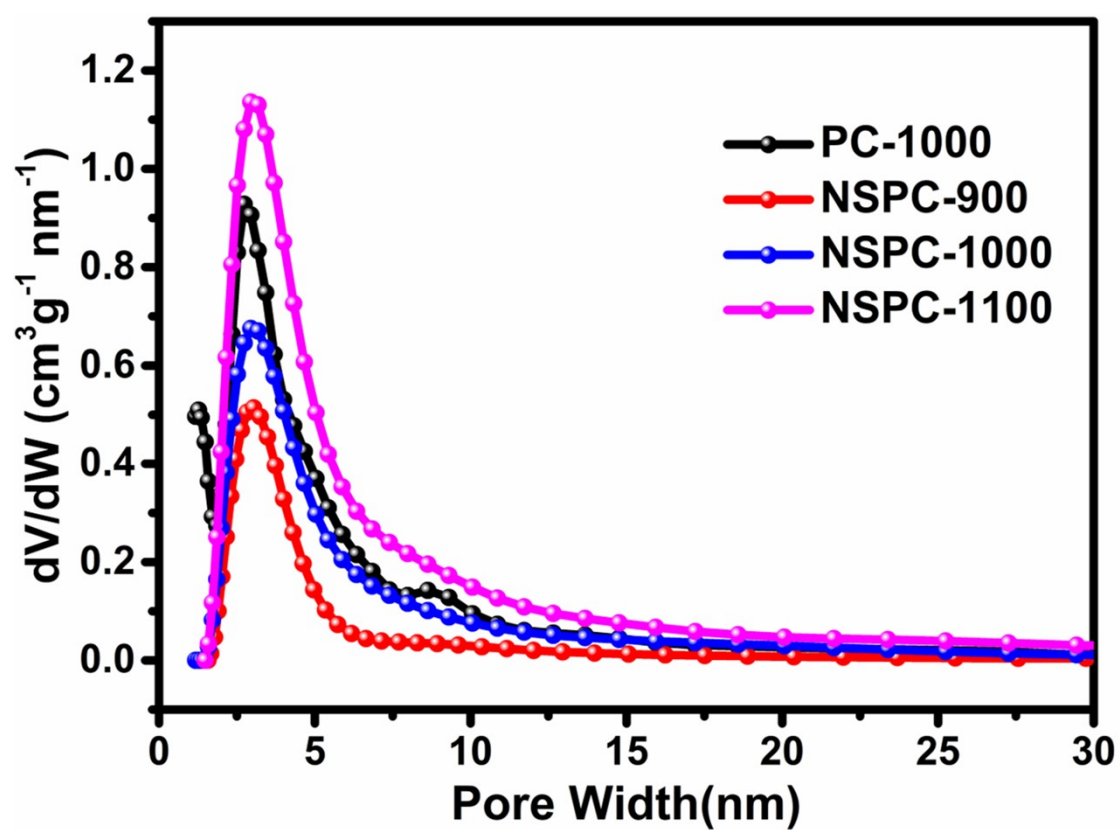

**Figure S2.** Pore size distributions for PC-1000, NSPC-900, NSPC-1000 and NSPC-1100 determined by NLDFT method.

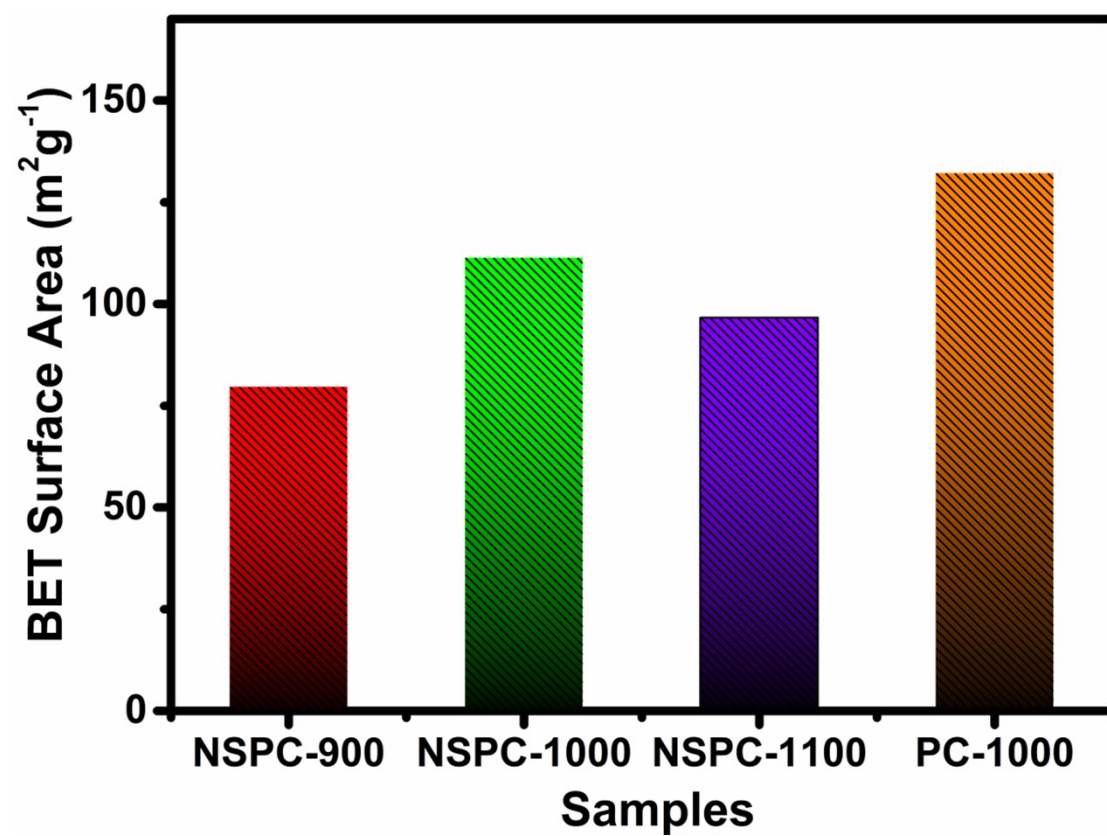

**Figure S3.** BET surface areas of NSPC-900, NSPC-1000, NSPC-1100 and PC-1000 samples.

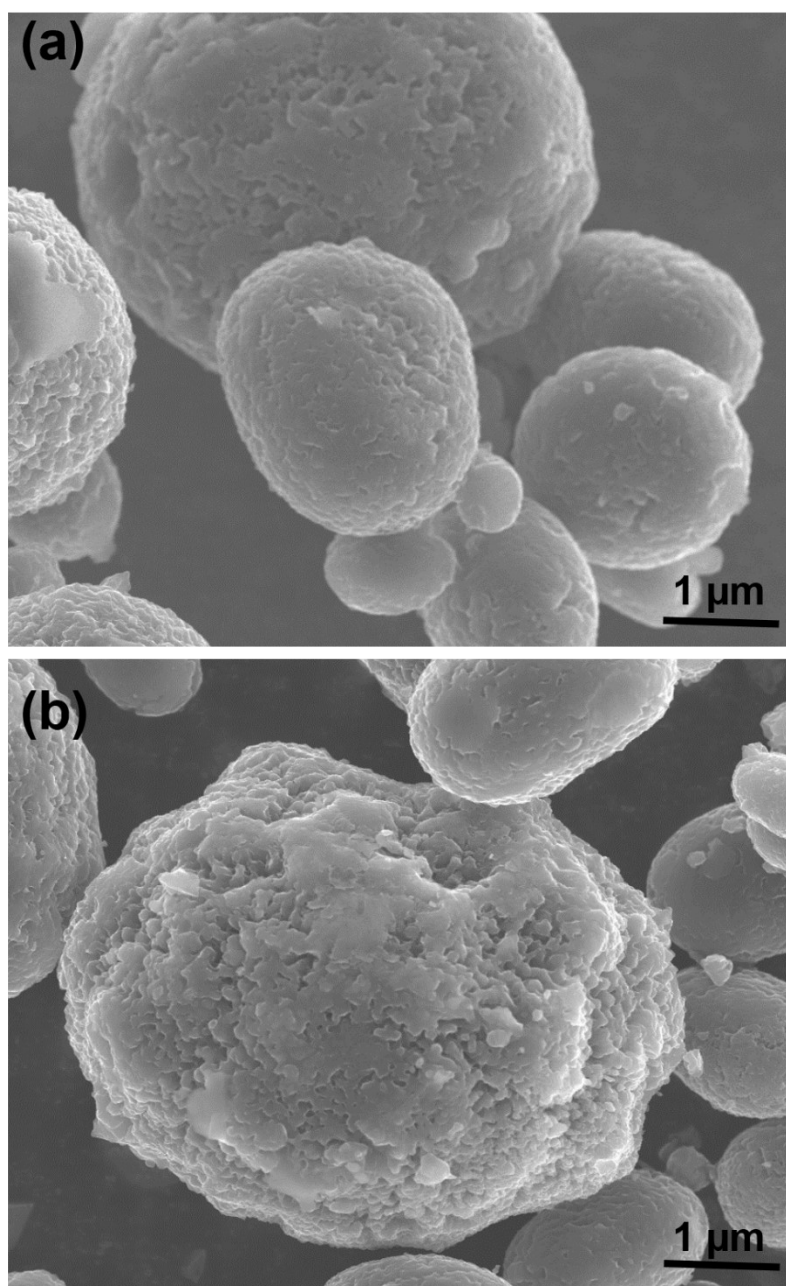

**Figure S4.** SEM images of (a) NSPC-900 and (b) NSPC-1100.

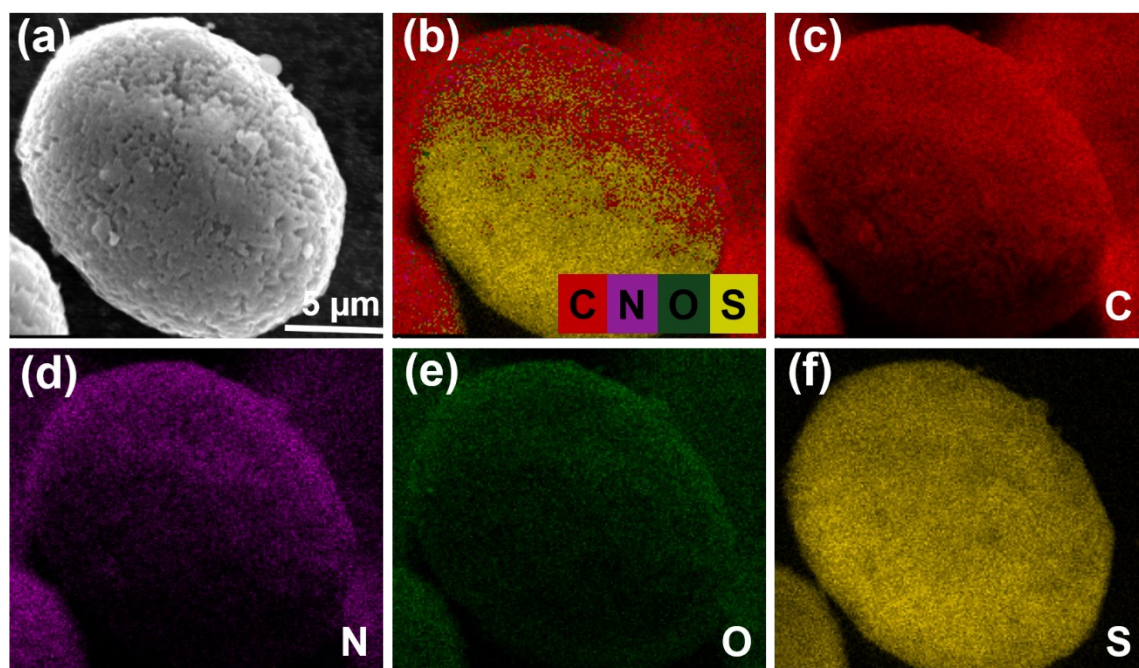

**Figure S5.** SEM image (a) and (b-f) SEM-EDS elemental mapping of NSPC-1000.

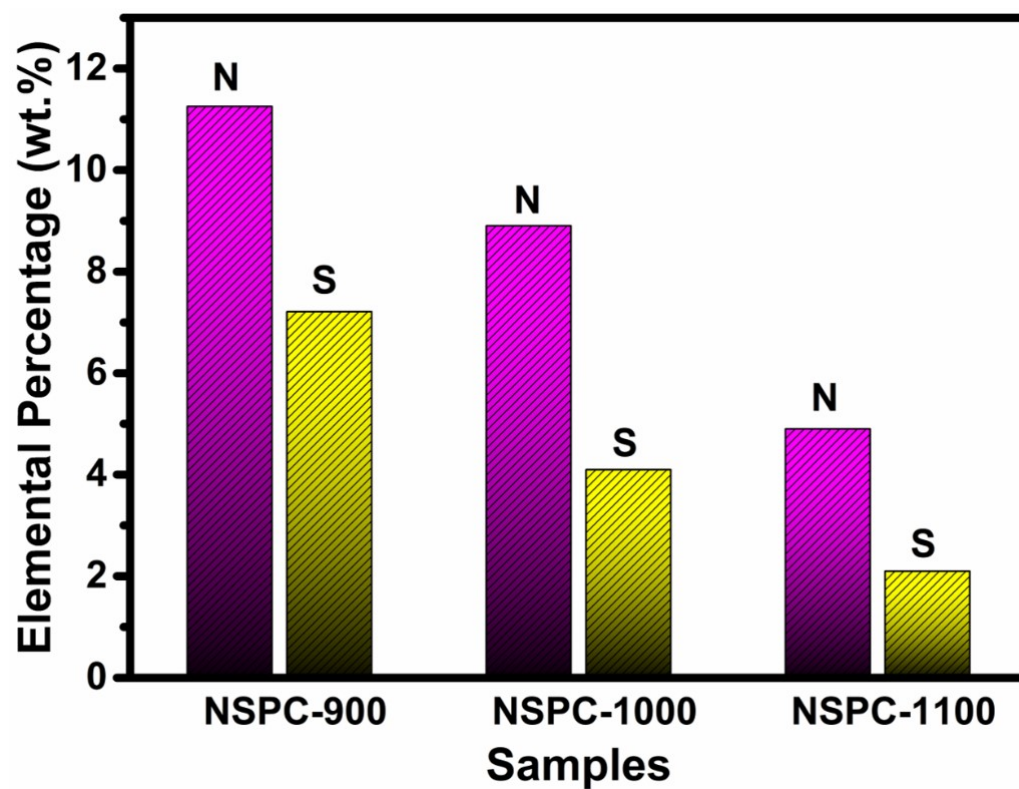

**Figure S6.** Elemental composition of as-prepared NSPC<sub>x</sub> samples.



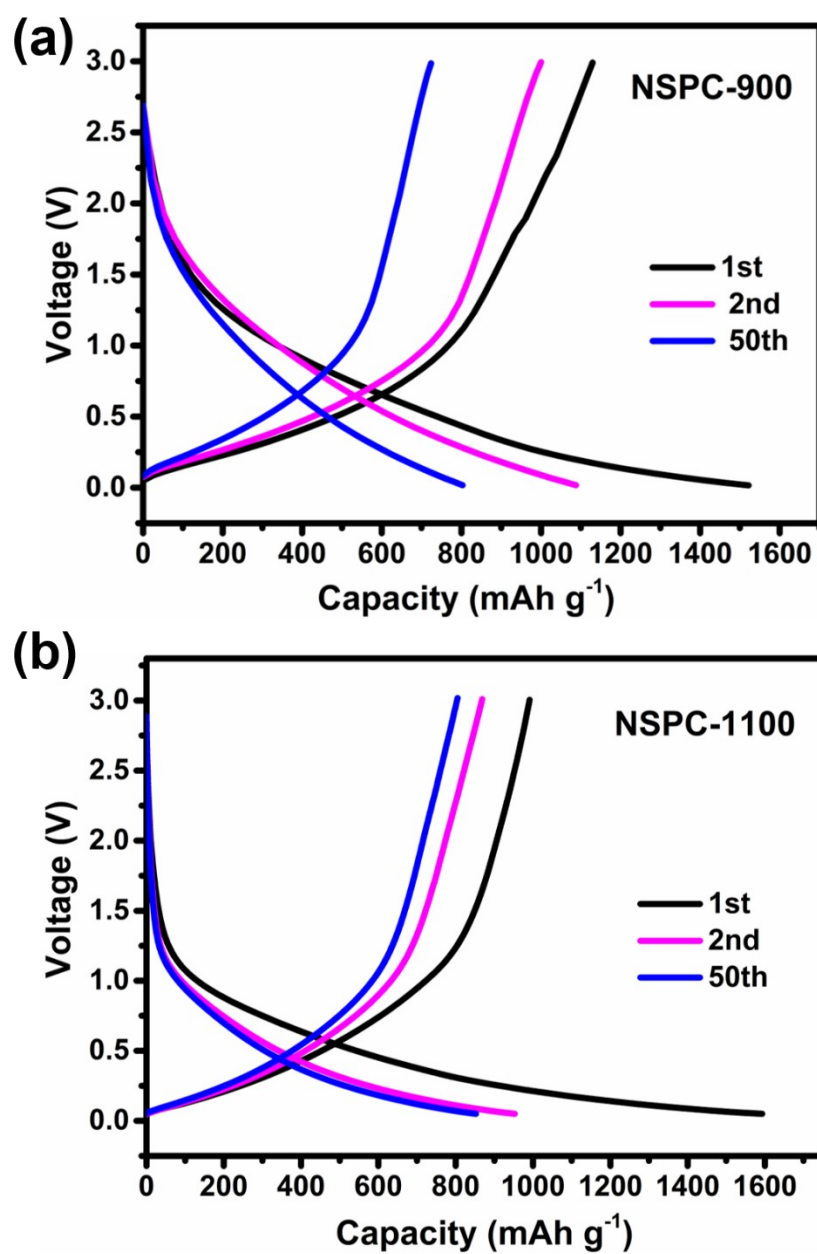

**Figure S7.** Charge-discharge curves for (a) NSPC-900 and (b) NSPC-1100 at a current density of  $0.1 \text{ A g}^{-1}$ .



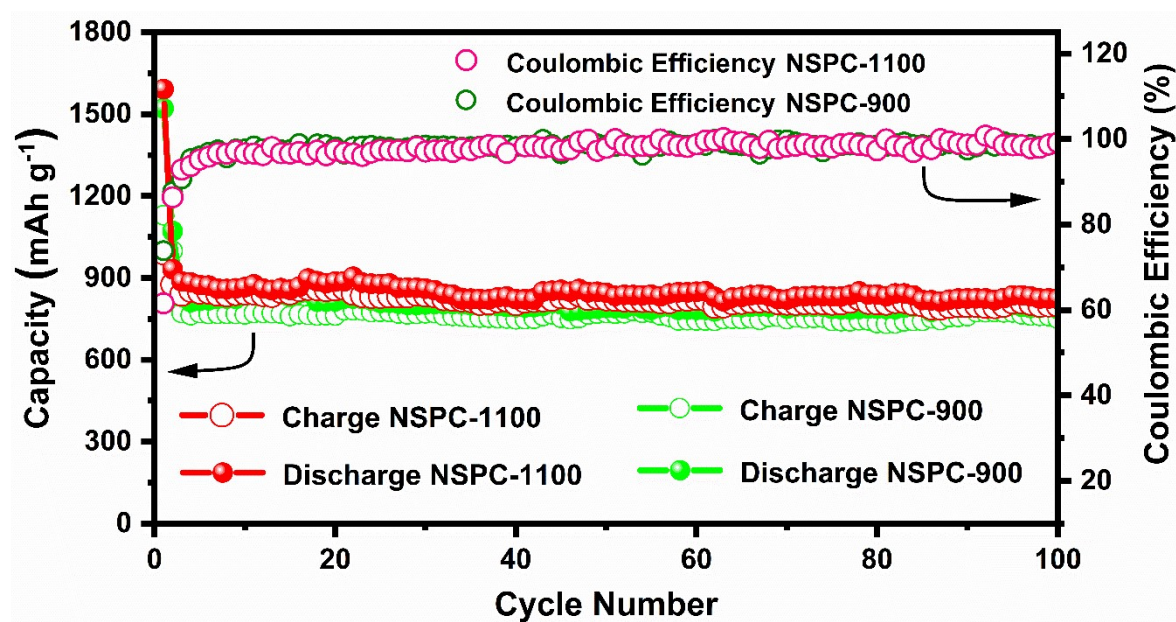

**Figure S8.** Cycling performance and corresponding Coulombic efficiencies of NSPC-900 and NSPC-1100 samples at 0.1 A g<sup>-1</sup>.

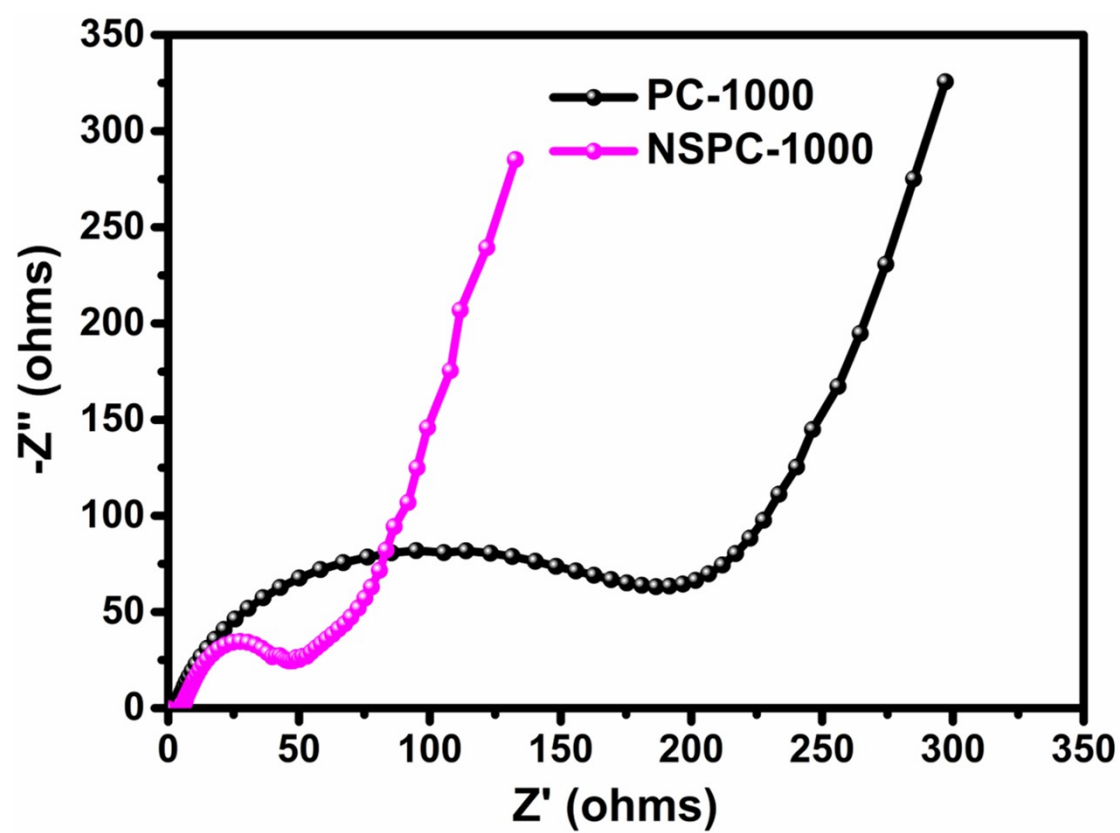

**Figure S9.** Electrochemical impedance spectra of PC-1000 and NSPC-1000.

**Table S2:** Comparison of lithium storage performance with recently reported literatures.

| Sr. No. | Material/Morphology                                                           | Stable Capacity                                                         | Cycling Performance                                                     | Reference |
|---------|-------------------------------------------------------------------------------|-------------------------------------------------------------------------|-------------------------------------------------------------------------|-----------|
| 1       | NSPC-1000                                                                     | 935 mA h g <sup>-1</sup><br>At 0.1 A g <sup>-1</sup> after 150 cycles   | 695 mA h g <sup>-1</sup><br>At 5 A g <sup>-1</sup> after 1150 cycles    | This Work |
| 2       | S,N-co-doped mesoporous carbon materials                                      | 675.1 mA h g <sup>-1</sup><br>At 0.1 A g <sup>-1</sup> after 150 cycles | 675.1 mA h g <sup>-1</sup><br>At 0.1 A g <sup>-1</sup> after 150 cycles | [1]       |
| 3       | Nitrogen and Sulfur Codoped Graphene Electrode Material                       | 1050 mA h g <sup>-1</sup><br>At 0.2 A g <sup>-1</sup> after 500 cycles  | 297 mA h g <sup>-1</sup><br>At 5 A g <sup>-1</sup> after 1500 cycles    | [2]       |
| 4       | Nitrogen and sulfur dual-doped graphene sheets                                | 490 mA h g <sup>-1</sup><br>At 0.1 A g <sup>-1</sup> after 500 cycles   | 211 mA h g <sup>-1</sup><br>At 1 A g <sup>-1</sup> after 5000 cycles    | [3]       |
| 5       | Hierarchical porous nitrogen, sulfur, dual-doped carbon                       | 1215 mA h g <sup>-1</sup><br>At 0.1 A g <sup>-1</sup> after 100 cycles  | 362 mA h g <sup>-1</sup><br>At 20 A g <sup>-1</sup> after 100 cycles    | [4]       |
| 6       | nitrogen and sulfur co-doped porous carbon                                    | 768 mA h g <sup>-1</sup><br>At 0.7 A g <sup>-1</sup> after 15 cycles    | 504 mA h g <sup>-1</sup><br>At 3.1 A g <sup>-1</sup> after 120 cycles   | [5]       |
| 7       | Nitrogen and Phosphorus Codoped Porous Carbon Framework                       | 940 mA h g <sup>-1</sup><br>At 0.5 A g <sup>-1</sup> after 20 cycles    | 740 mA h g <sup>-1</sup><br>At 2 A g <sup>-1</sup> after 2000 cycles    | [6]       |
| 8       | Nitrogen and sulfur dual-doped carbon films                                   | 832.4 mA h g <sup>-1</sup><br>At 0.1 A g <sup>-1</sup> after 42 cycles  | 357.2 mA h g <sup>-1</sup><br>At 2 A g <sup>-1</sup> after 2000 cycles  | [7]       |
| 9       | Ultrahigh level nitrogen/sulfur co-doped carbon                               | 917 mA h g <sup>-1</sup><br>At 0.1 A g <sup>-1</sup> after 40 cycles    | 653 mA h g <sup>-1</sup><br>At 1 A g <sup>-1</sup> after 500 cycles     | [8]       |
| 10      | N and S co-doped graphene sheets                                              | 732.3 mA h g <sup>-1</sup><br>At 0.5 A g <sup>-1</sup> after 70 cycles  | 788.2 mA h g <sup>-1</sup><br>At 0.1 A g <sup>-1</sup> after 50 cycles  | [9]       |
| 11      | sulfur doped graphene-based nanosheets                                        | 740 mA h g <sup>-1</sup><br>At 0.37 A g <sup>-1</sup> after 10 cycles   | 290 mA h g <sup>-1</sup><br>At 1.48 A g <sup>-1</sup> after 500 cycles  | [10]      |
| 12      | Hierarchically porous and nitrogen, sulfur-codoped graphene-like microspheres | 1180 mA h g <sup>-1</sup><br>At 0.05 A g <sup>-1</sup> after 70 cycles  | 725 mA h g <sup>-1</sup><br>At 0.5 A g <sup>-1</sup> after 80 cycles    | [11]      |

## References

- [1] Zhuang G-l, Bai J-q, Tao X-y, Luo J-m, Wang X-d, Gao Y-f, et al. Synergistic effect of S,N-co-doped mesoporous carbon materials with high performance for oxygen-reduction reaction and Li-ion batteries. *Journal of Materials Chemistry A*. 2015;3:20244-53.
- [2] Ai W, Luo Z, Jiang J, Zhu J, Du Z, Fan Z, et al. Nitrogen and Sulfur Codoped Graphene: Multifunctional Electrode Materials for High-Performance Li-Ion Batteries and Oxygen Reduction Reaction. *Advanced Materials*. 2014;26:6186-92.
- [3] Zhou Y, Zeng Y, Xu D, Li P, Wang H-g, Li X, et al. Nitrogen and sulfur dual-doped graphene sheets as anode materials with superior cycling stability for lithium-ion batteries. *Electrochimica Acta*. 2015;184:24-31.
- [4] Ou J, Yang L, Zhang Z, Xi X. Honeysuckle-derived hierarchical porous nitrogen, sulfur, dual-doped carbon for ultra-high rate lithium ion battery anodes. *Journal of Power Sources*. 2016;333:193-202.
- [5] Zhang J, Yang Z, Qiu J, Lee H-W. Design and synthesis of nitrogen and sulfur co-doped porous carbon via two-dimensional interlayer confinement for a high-performance anode material for lithium-ion batteries. *Journal of Materials Chemistry A*. 2016;4:5802-9.
- [6] Ma C, Deng C, Liao X, He Y, Ma Z, Xiong H. Nitrogen and Phosphorus Codoped Porous Carbon Framework as Anode Material for High Rate Lithium-Ion Batteries. *ACS Applied Materials & Interfaces*. 2018;10:36969-75.
- [7] Ruan J, Yuan T, Pang Y, Luo S, Peng C, Yang J, et al. Nitrogen and sulfur dual-doped carbon films as flexible free-standing anodes for Li-ion and Na-ion batteries. *Carbon*. 2018;126:9-16.
- [8] Qiu Z, Lin Y, Xin H, Han P, Li D, Yang B, et al. Ultrahigh level nitrogen/sulfur co-doped carbon as high performance anode materials for lithium-ion batteries. *Carbon*. 2018;126:85-92.
- [9] Cai D, Wang C, Shi C, Tan N. Facile synthesis of N and S co-doped graphene sheets as anode materials for high-performance lithium-ion batteries. *Journal of Alloys and*

Compounds. 2018;731:235-42.

[10] Yun YS, Le V-D, Kim H, Chang S-J, Baek SJ, Park S, et al. Effects of sulfur doping on graphene-based nanosheets for use as anode materials in lithium-ion batteries. *Journal of Power Sources*. 2014;262:79-85.

[11] Sun D, Yang J, Yan X. Hierarchically porous and nitrogen, sulfur-codoped graphene-like microspheres as a high capacity anode for lithium ion batteries. *Chemical Communications*. 2015;51:2134-7.
